# Supplementary material for: Prognostic significance of frequent CLDN18-ARHGAP26/6 fusion in gastric signet-ring cell cancer
Source: PubMed Central journal article supplement (PMC6026495; doi:10.1038/s41467-018-04907-0), 2018-06-30
Supplement: 41467_2018_4907_MOESM1_ESM.pdf [file 41467_2018_4907_MOESM1_ESM.pdf]

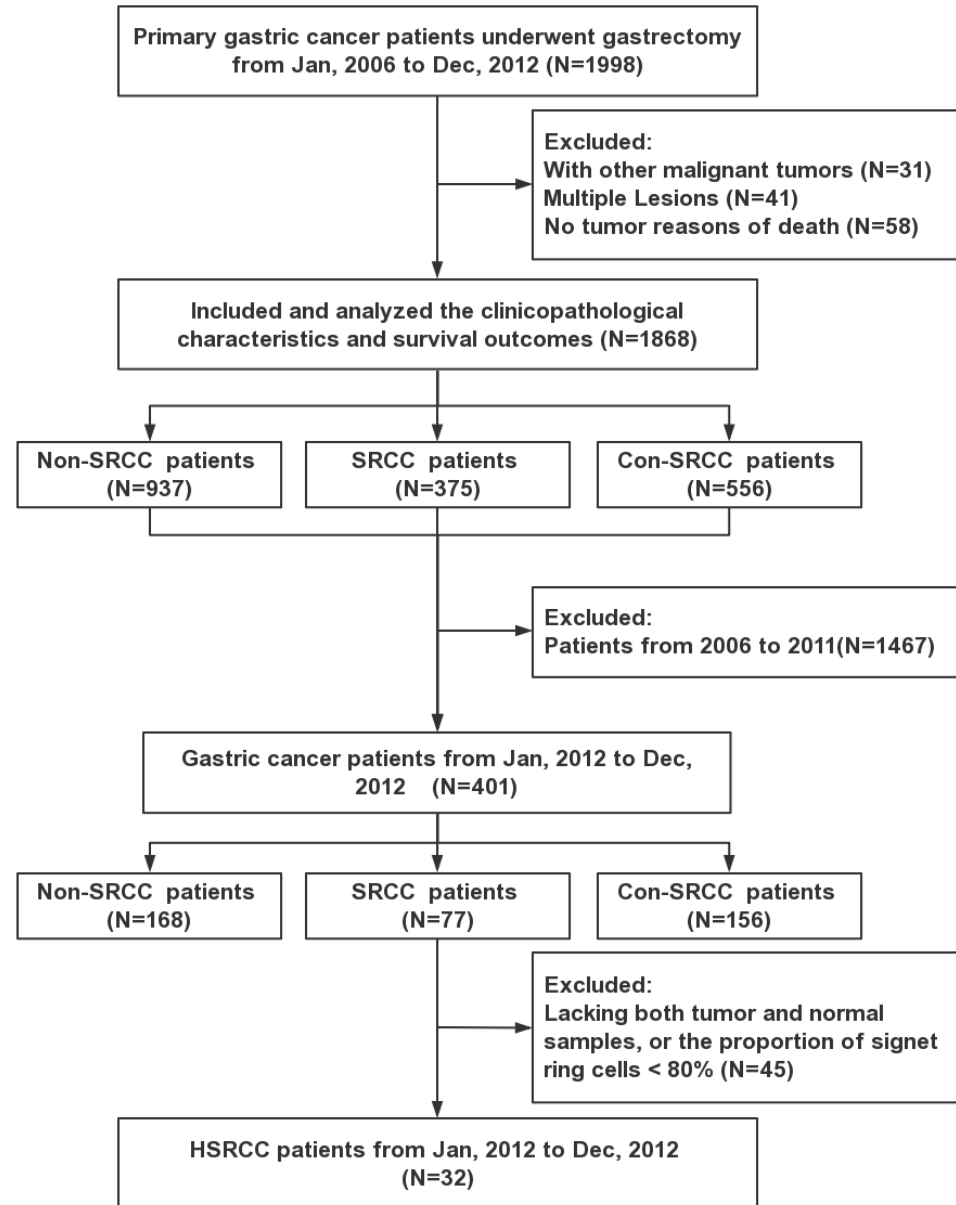

**Supplementary Figure 1: Flowchart of patients' inclusion/exclusion**

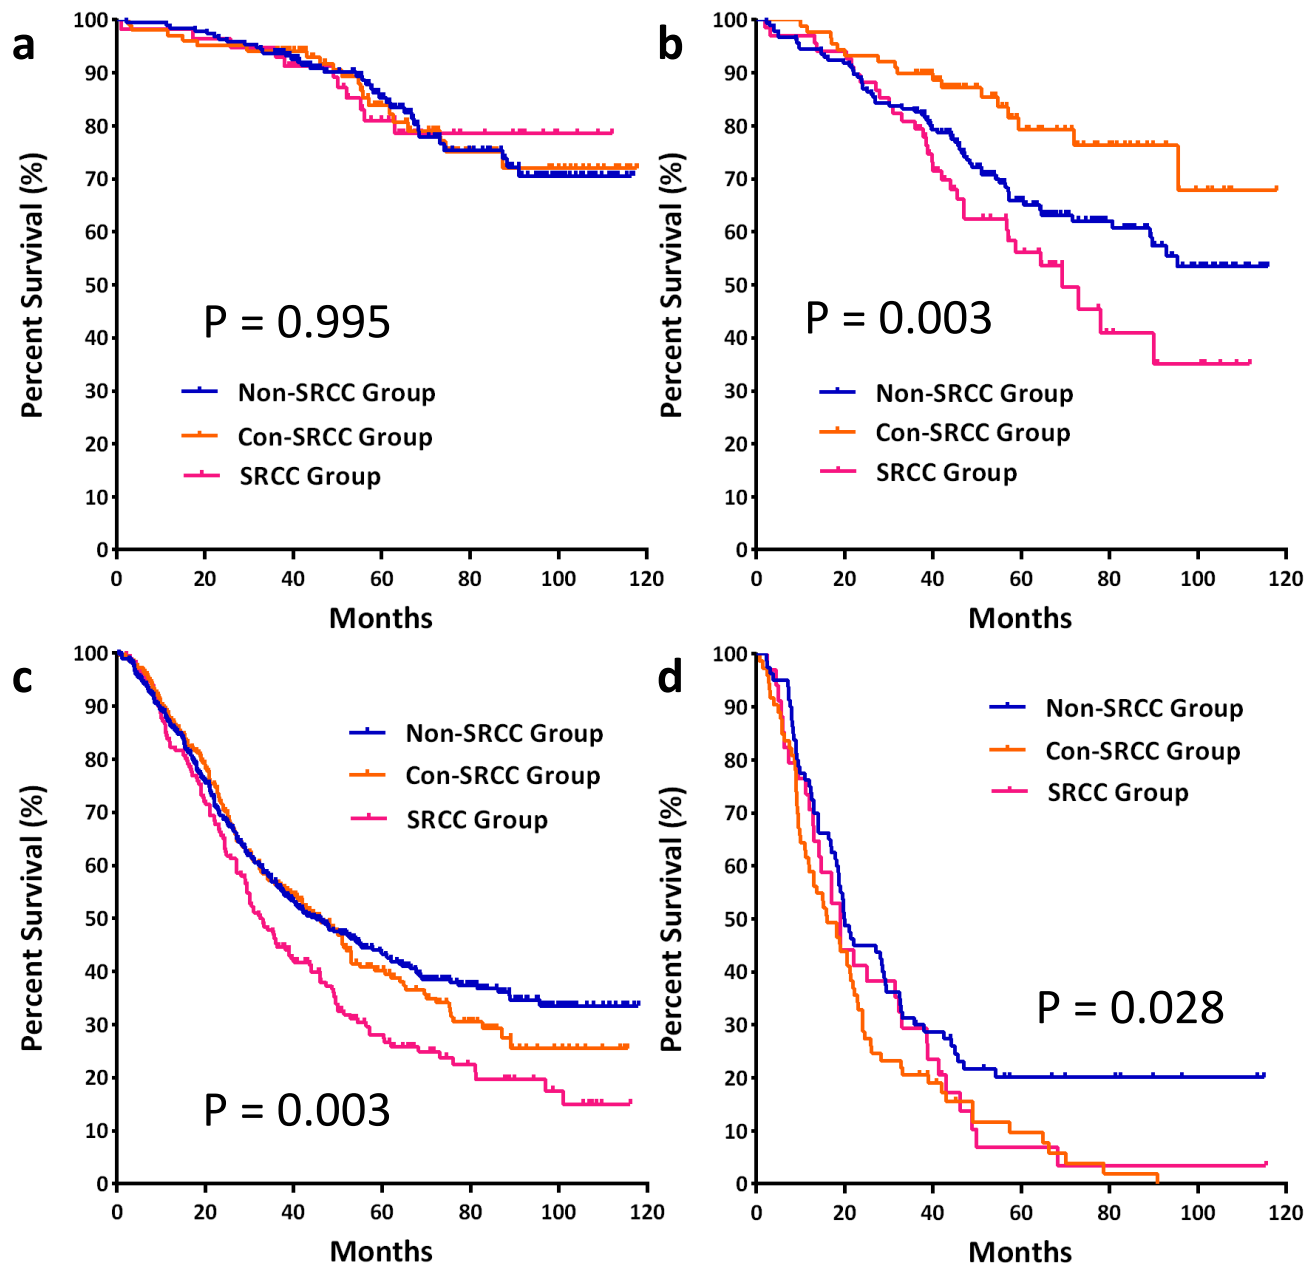

**Supplementary Figure 2: Survival outcomes in gastric cancer patients with different signet-ring cell frequency** Survival curves of patients among the non-SRCC, con-SRCC, and SRCC in Stage I (a), stage II (b), stage III (c), Stage IV (d). *P* value was estimated by using Cox Model.

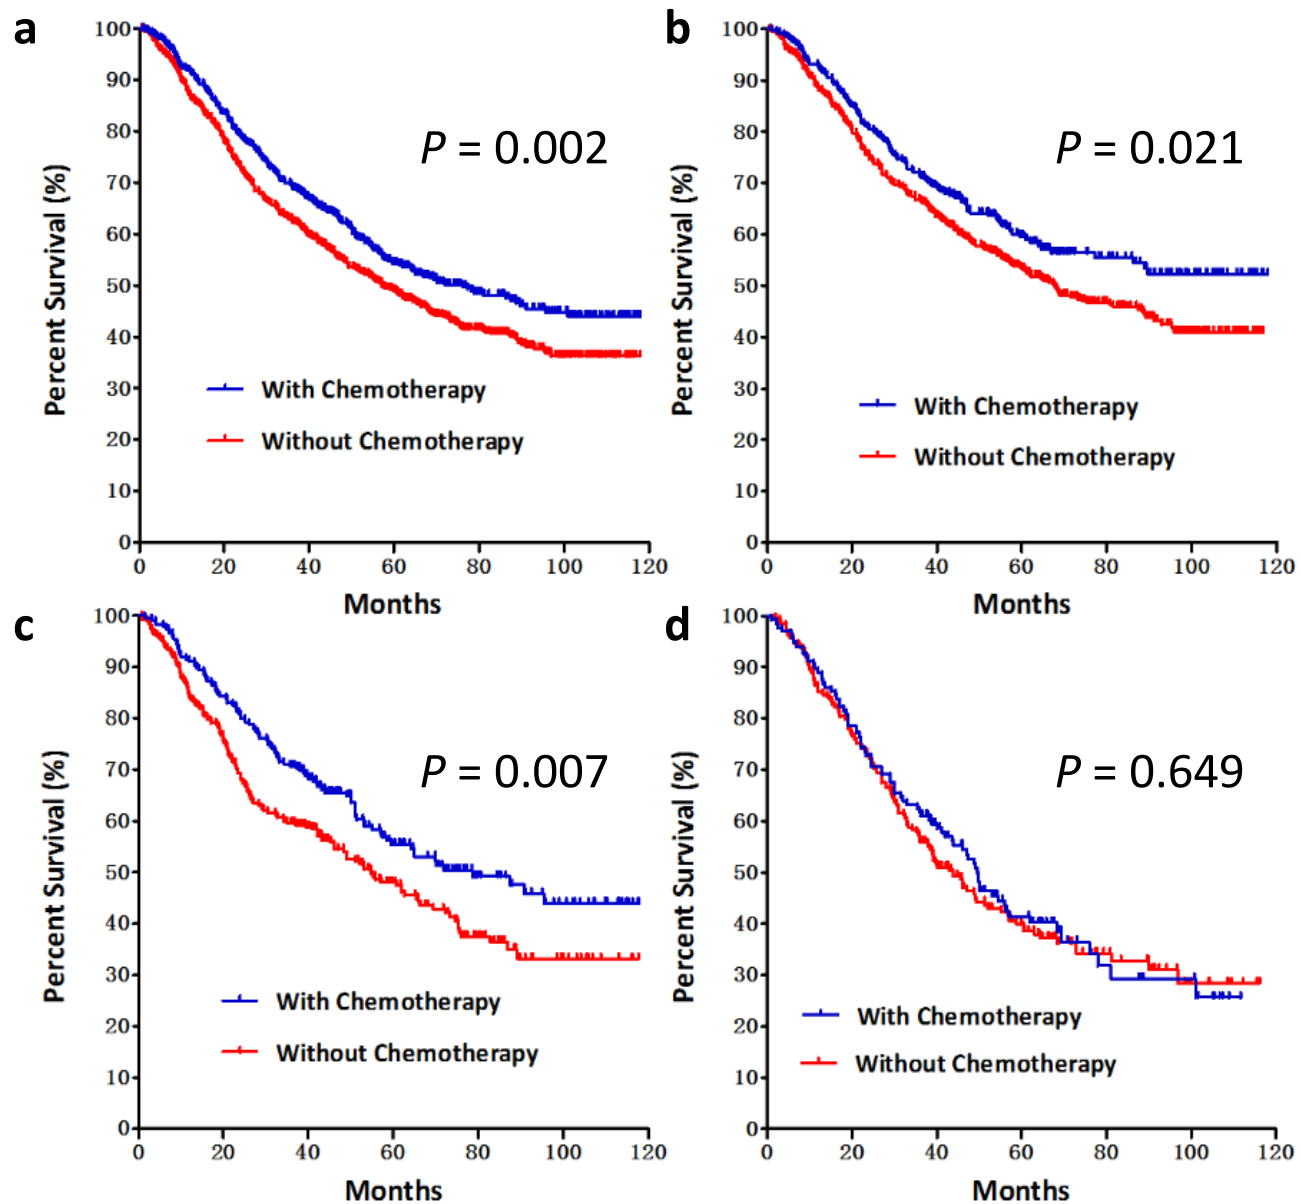

**Supplementary Figure 3: Relationship between survival outcomes and chemotherapy treatment.** Survival curves with/without chemotherapy treatment in all patients (a), non-SRCC (b), con-SRCC (c), and SRCC (d).  $P$  value was estimated by using Cox Model.

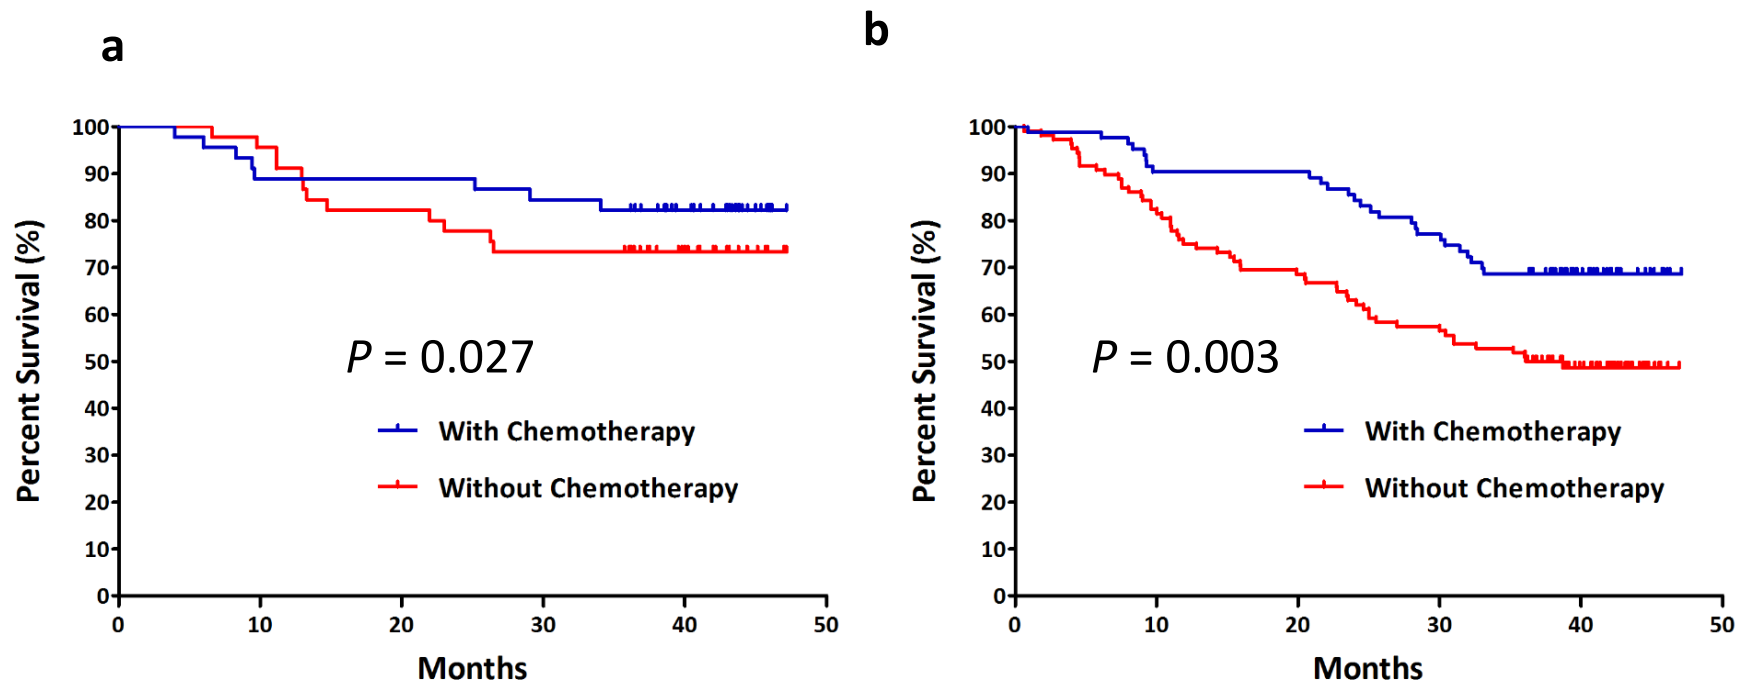

**Supplementary Figure 4: Relationship between survival outcomes and chemotherapy treatment.** Survival curves with/without chemotherapy treatment in Intestinal type (N = 90) (**a**) and Diffuse type (N = 191) (**b**) are illustrated in patients with Lauren's subtypes since 2012, when such classification has been routinely evaluated in West China Hospital. *P* value was estimated by using Cox model adjusted for TNM stage.

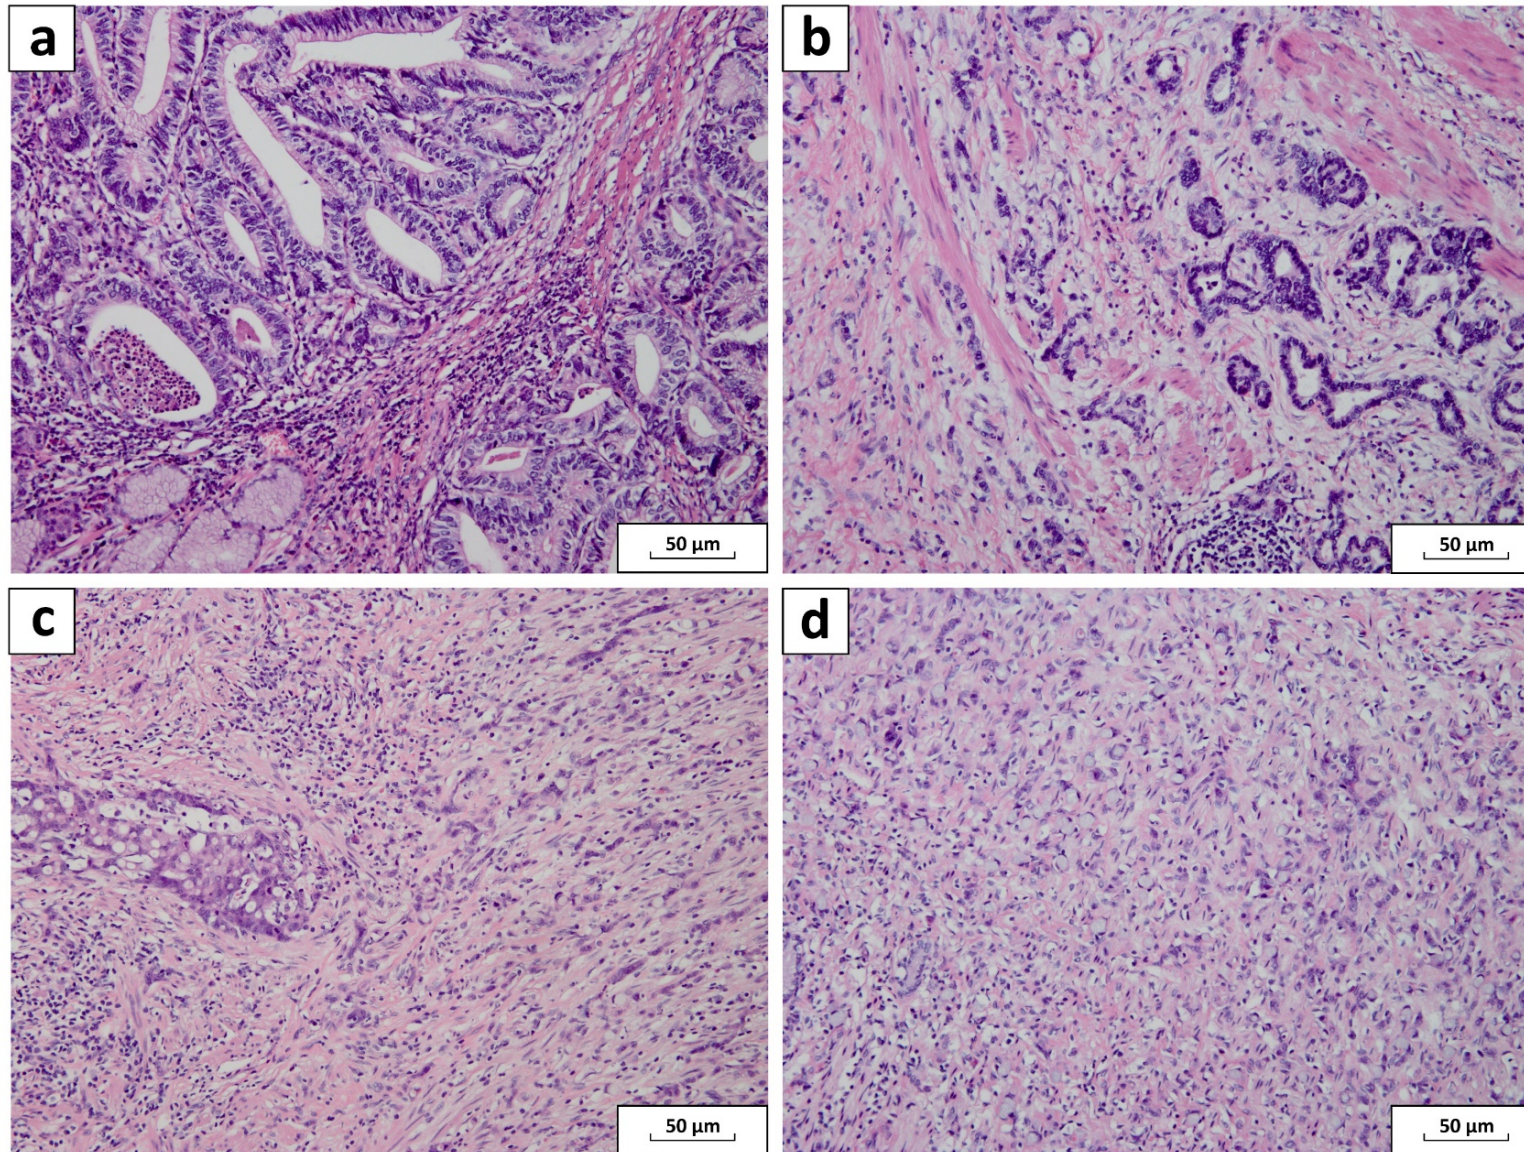

**Supplementary Figure 5: Percentage of signet-ring cells among 4 groups.** Microscopic characteristics of tumor samples with hematoxylin/eosin staining in (a) non-SRCC (with no signet-ring cell), (b) con-SRCC (with < 50% presence of signet-ring cells), (c) SRCC (with > 50% presence of signet-ring cells), and (d) HSRCC (with > 80% presence of signet-ring cells).

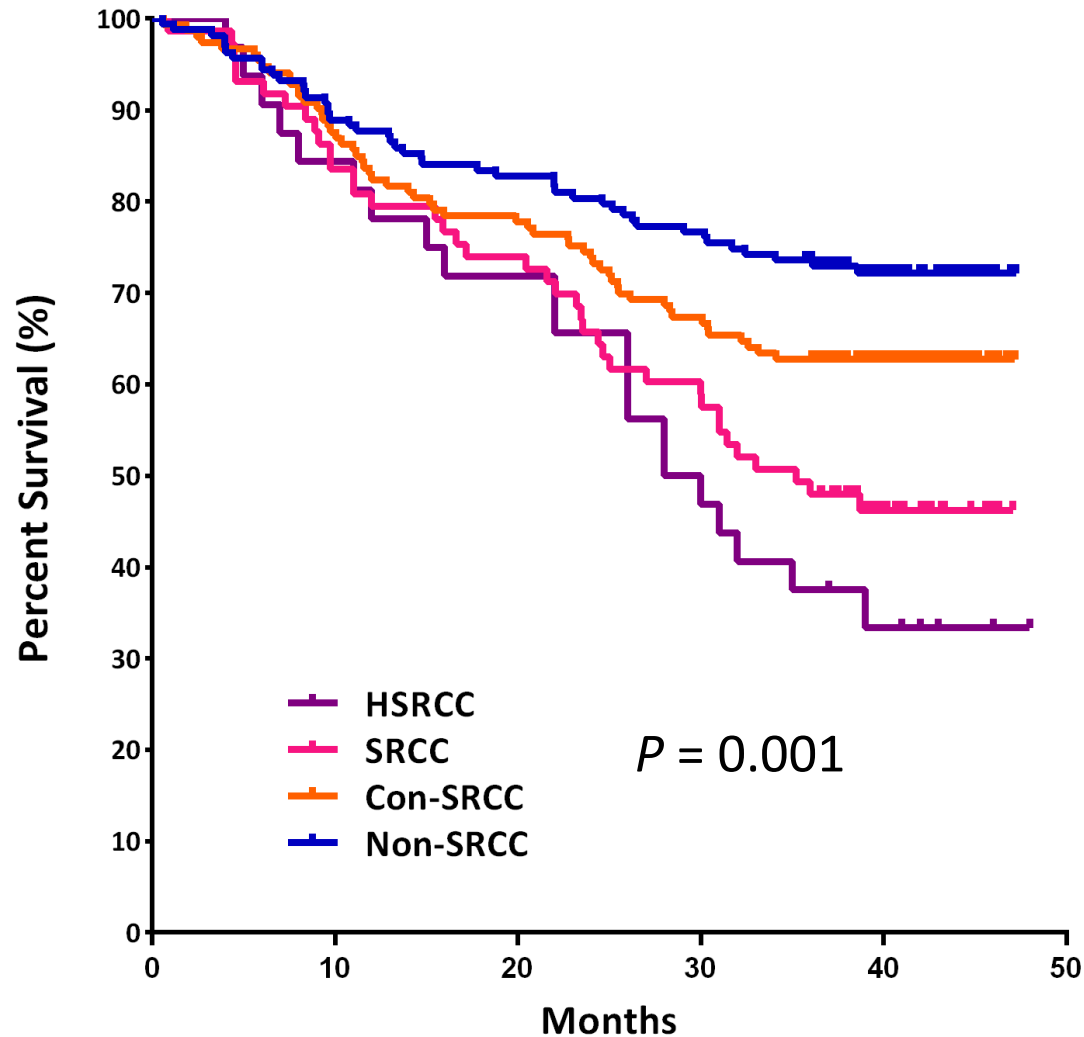

**Supplementary Figure 6: Survival outcomes in gastric cancer patients with different signet-ring cell frequency (2012).** Survival curves of the patients in 2012 among the four groups the non-SRCC, con-SRCC, SRCC and HSRCC. *P* value was estimated among non-SRCC, con-SRCC, and SRCC only by using Cox Model.

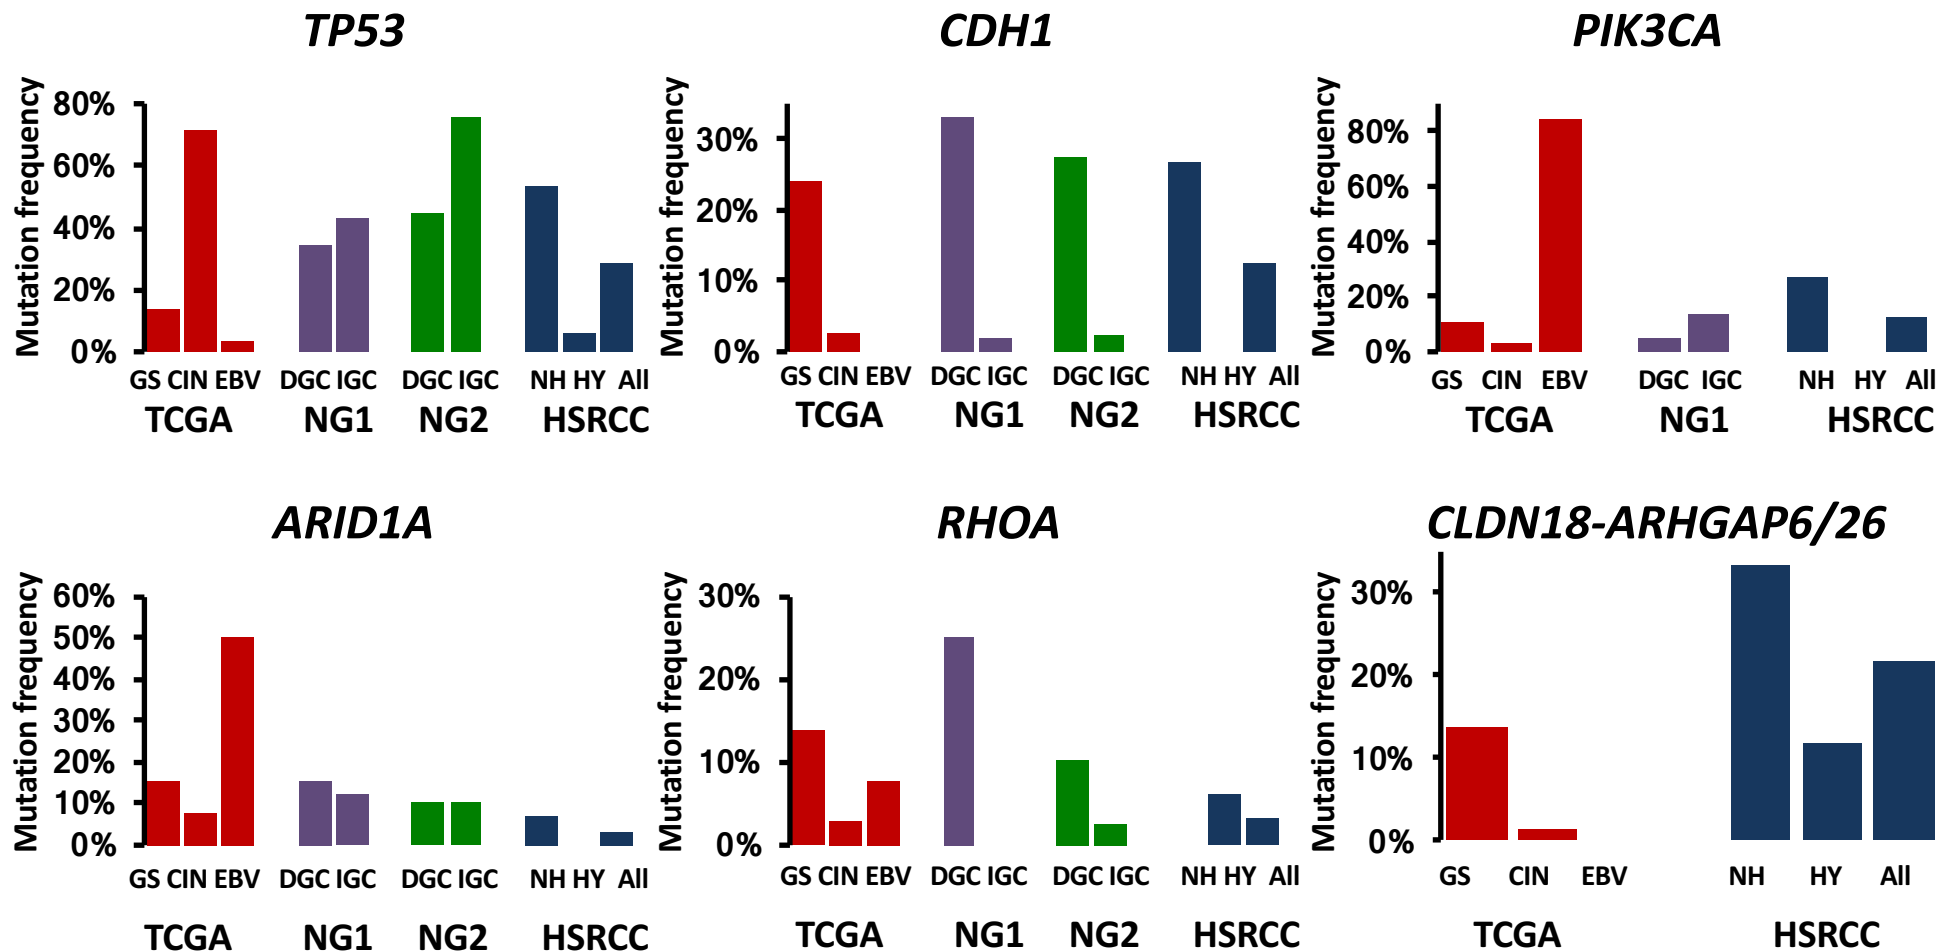

**Supplementary Figure 7: Frequency of the common gene alterations in different studies.**

Mutation rate were retrieved from 4 studies, including TCGA (ref3, N = 58, 147, and 26 for GS, CIN and EBV subtypes, respectively), NG1 (ref7, N = 87 and 51 for DGC and IGC, respectively), NG2 (ref11, N = 29 and 41 for DGC and IGC, respectively), and our HSRCC study (N = 15, 17 and 32 for NH, HY, and All, respectively). GS = genomically stable; CIN = chrom instability; EBV = EBV-CIMP; DGC = Diffuse type of gastric cancer; IGC = intestinal type of gastric cancer; NH = non-hypomutant; HY = hypomutant.

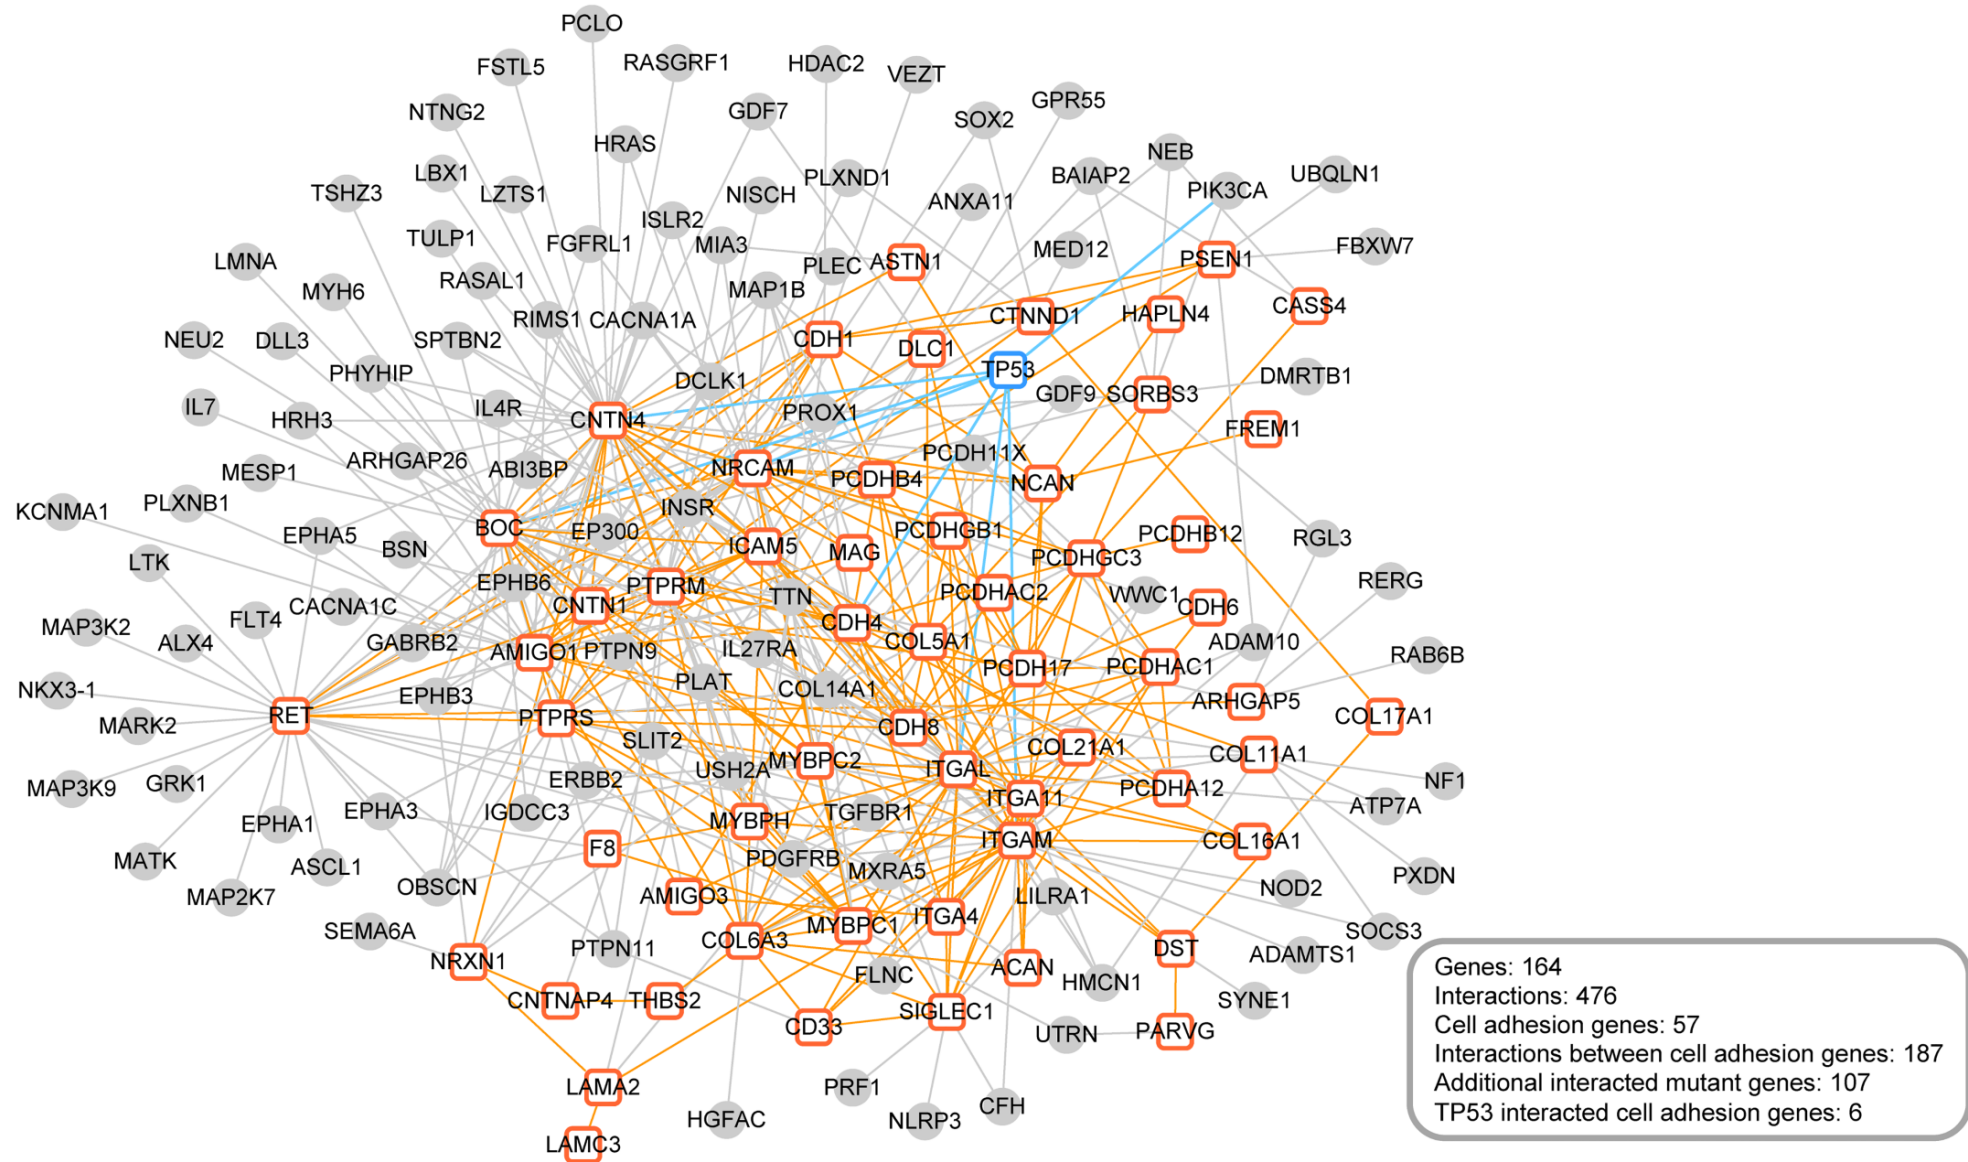

**Supplementary Figure 8: The PPI network of mutant cell adhesion genes.** 57 cell adhesion genes (orange) formed 187 interactions. 107 additional mutant genes (gray) also have interaction with these cell adhesion genes. TP53 (blue) is also involved in the cell adhesion subnetwork.



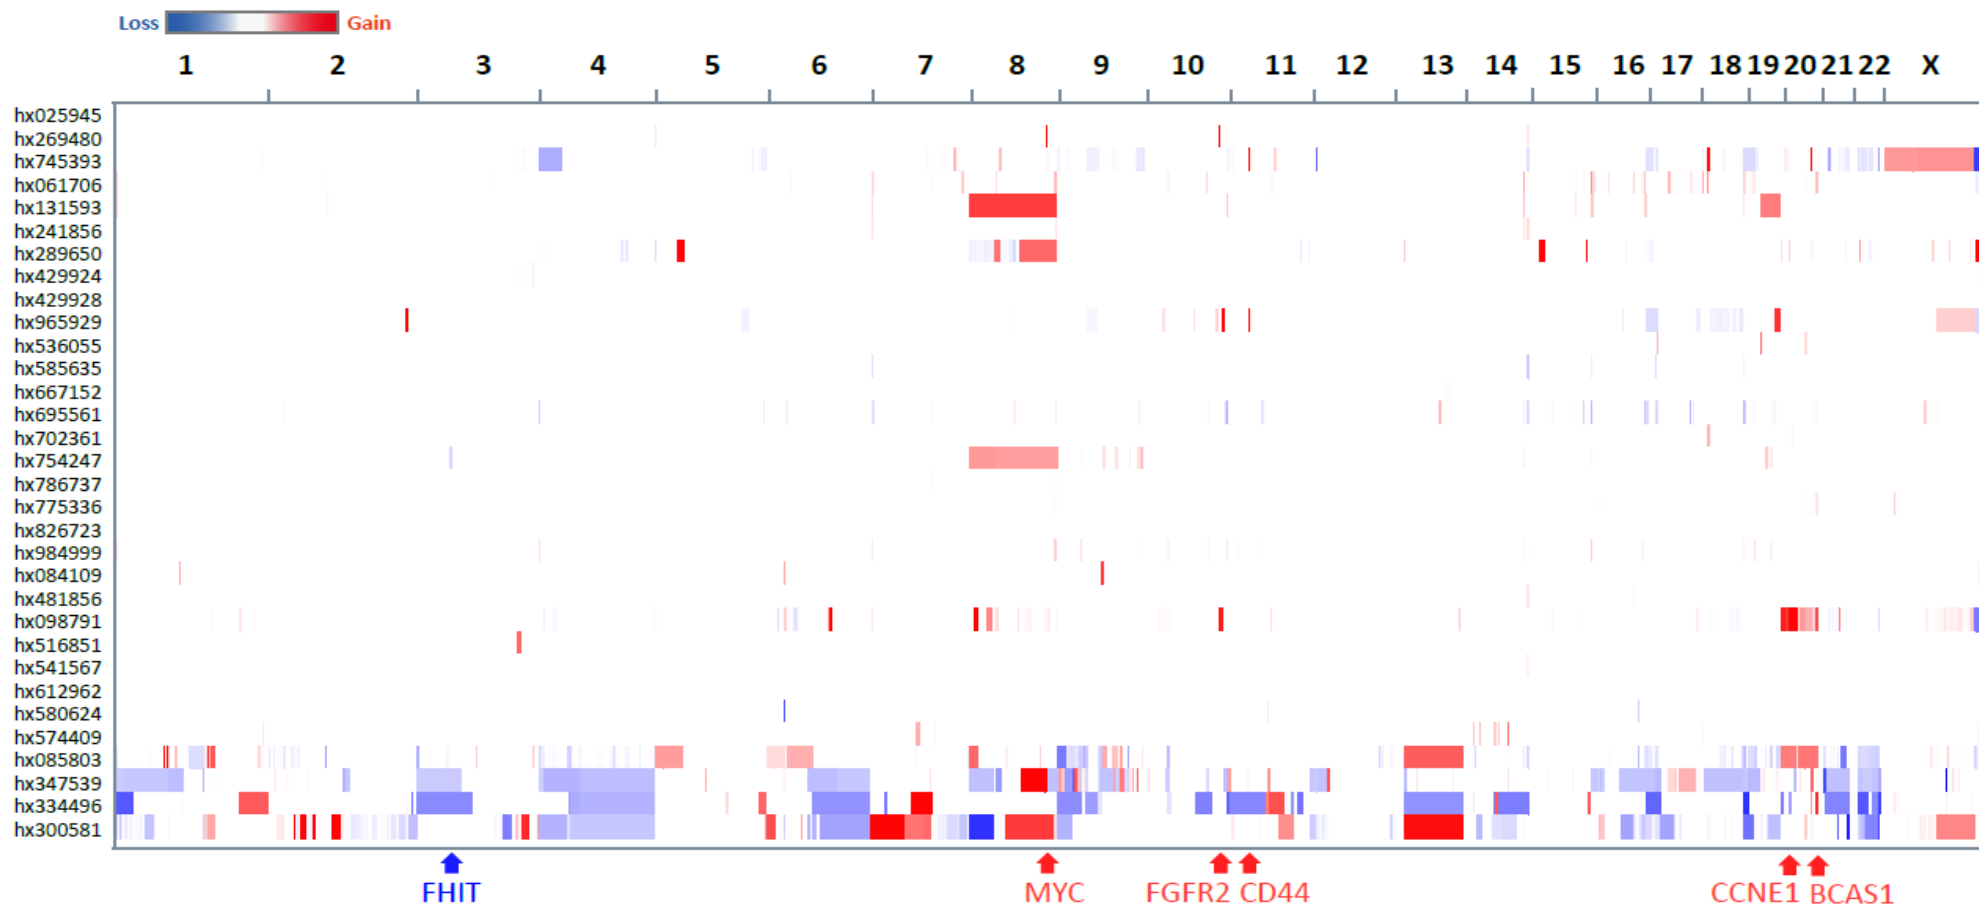

**Supplementary Figure 9: somatic copy number alterations of HSRCC patients:** Overall SCNAs were illustrated for each patients listed on y-axis, and all chromosomes (except Y) on the x-axis. Loss and gain were shown in blue and red, respectively.

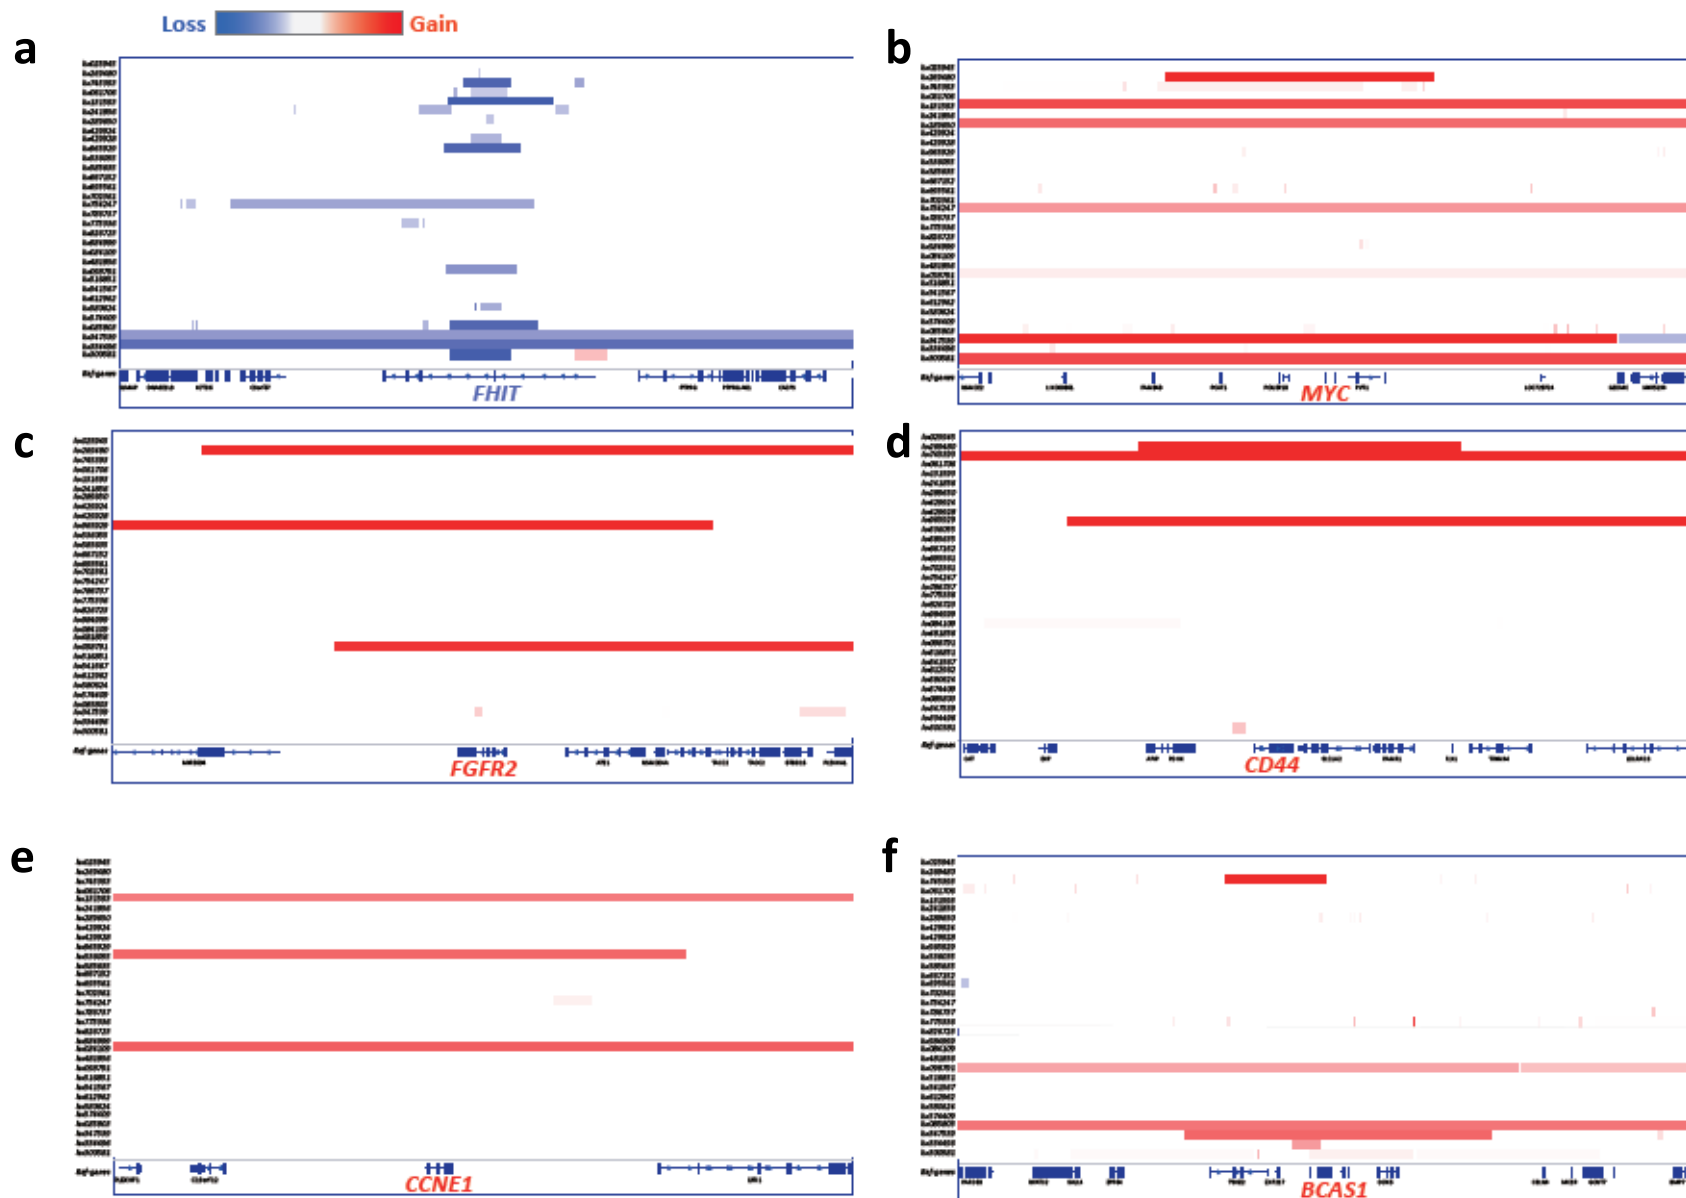

**Supplementary Figure 10: Recurrent somatic copy number variations in HSRCC patients.** foci deletion of (a) *FHIT*, overlapped regions of gain at (b) 8q24.21 (including *MYC*), (c) 10q26.13 (including *FGFR2*), (d) 11p13 (including *CD44*), (e) 19q12 (including *CCNE1*), and (f) 20q13.2 (including *BCAS1*).

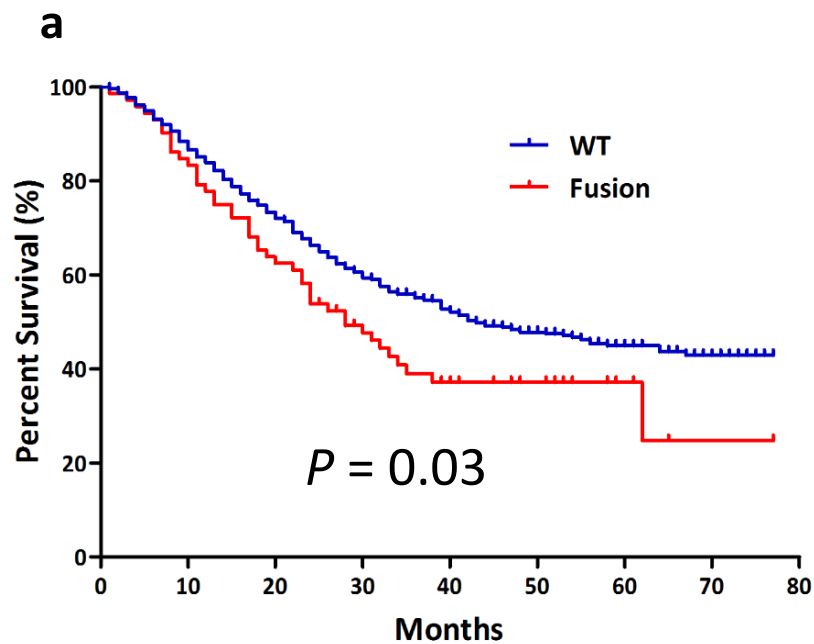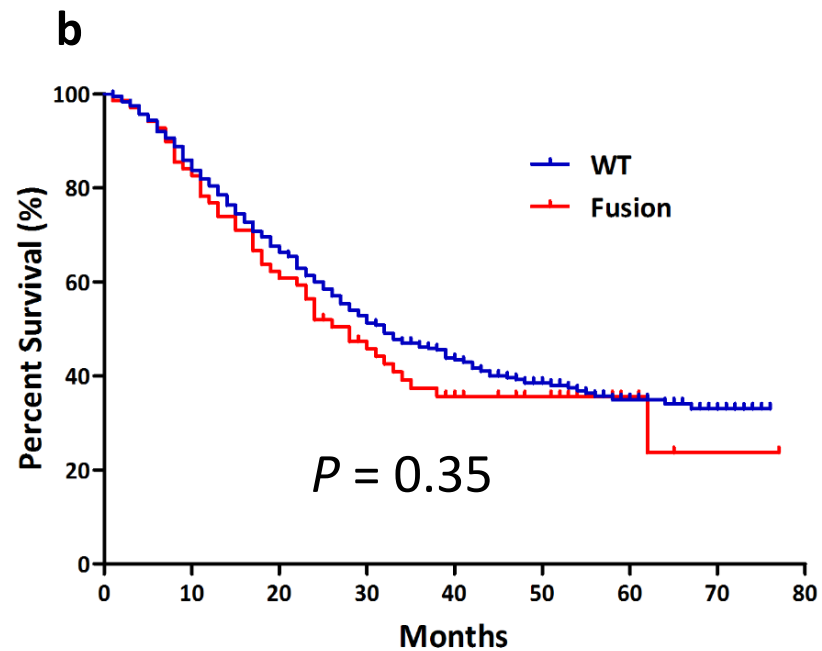

**Supplementary Figure 11: Survival outcomes in all gastric cancer patients (a) and Stage III/IV gastric cancer patients (b) with *CLDN18-ARHGAP26/6* fusion. Survival curves of patients with *CLDN18-ARHGAP26/6* and fusion-free. *P* value was estimated by using Cox Model; WT: wildtype**

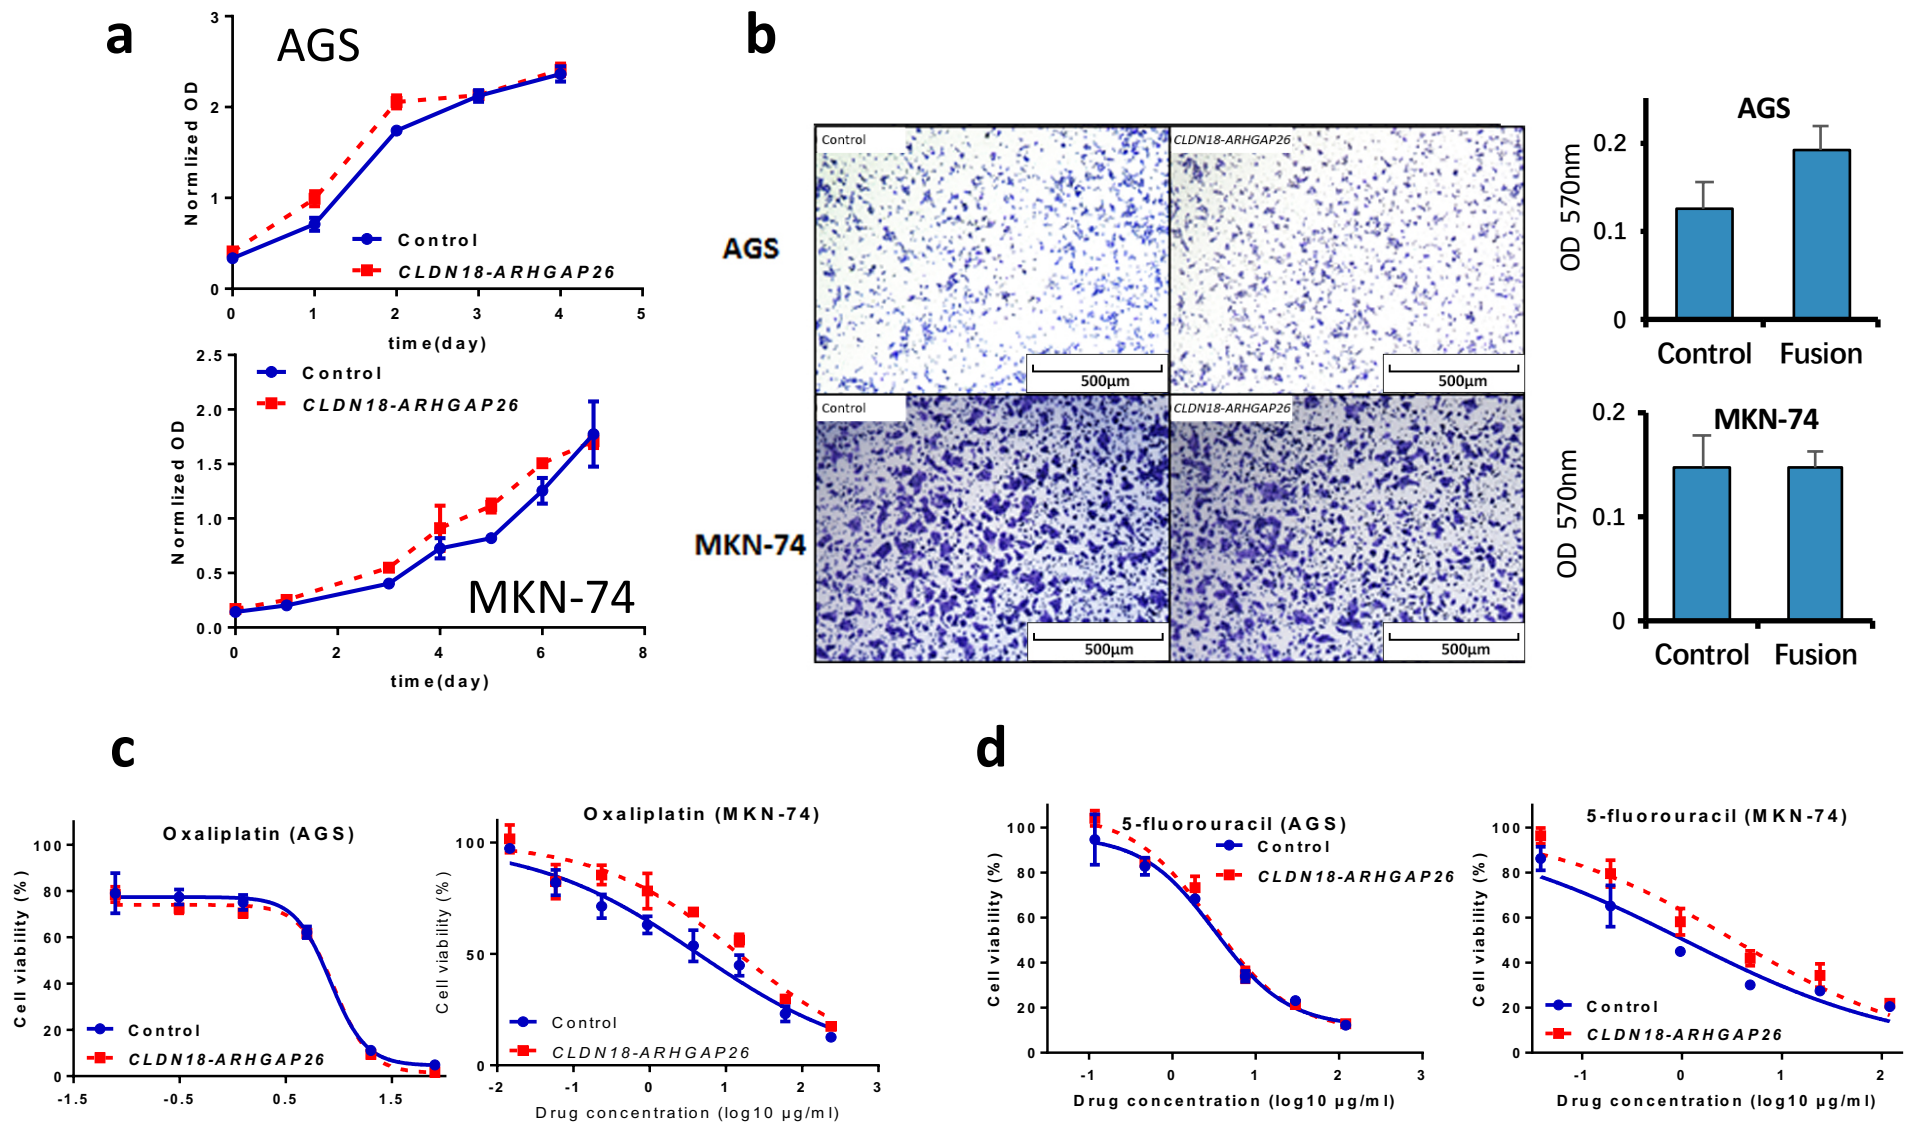

**Supplementary Figure 12: Impact of *CLDN18-ARHGAP26* overexpression in AGS and MKN-74.** Cell proliferation (a), cell migration (b), and drug response to oxaliplatin (c) 5-fluorouracil (d) was estimated in *CLDN18-ARHGAP26* stably expressed AGS/MKN-74 cells and their matched control. AGS and MKN-74 were treated for 2 and 3 days, respectively. Control: empty control. Each experiment has been replicated for three times, and data is presented as mean  $\pm$  SD

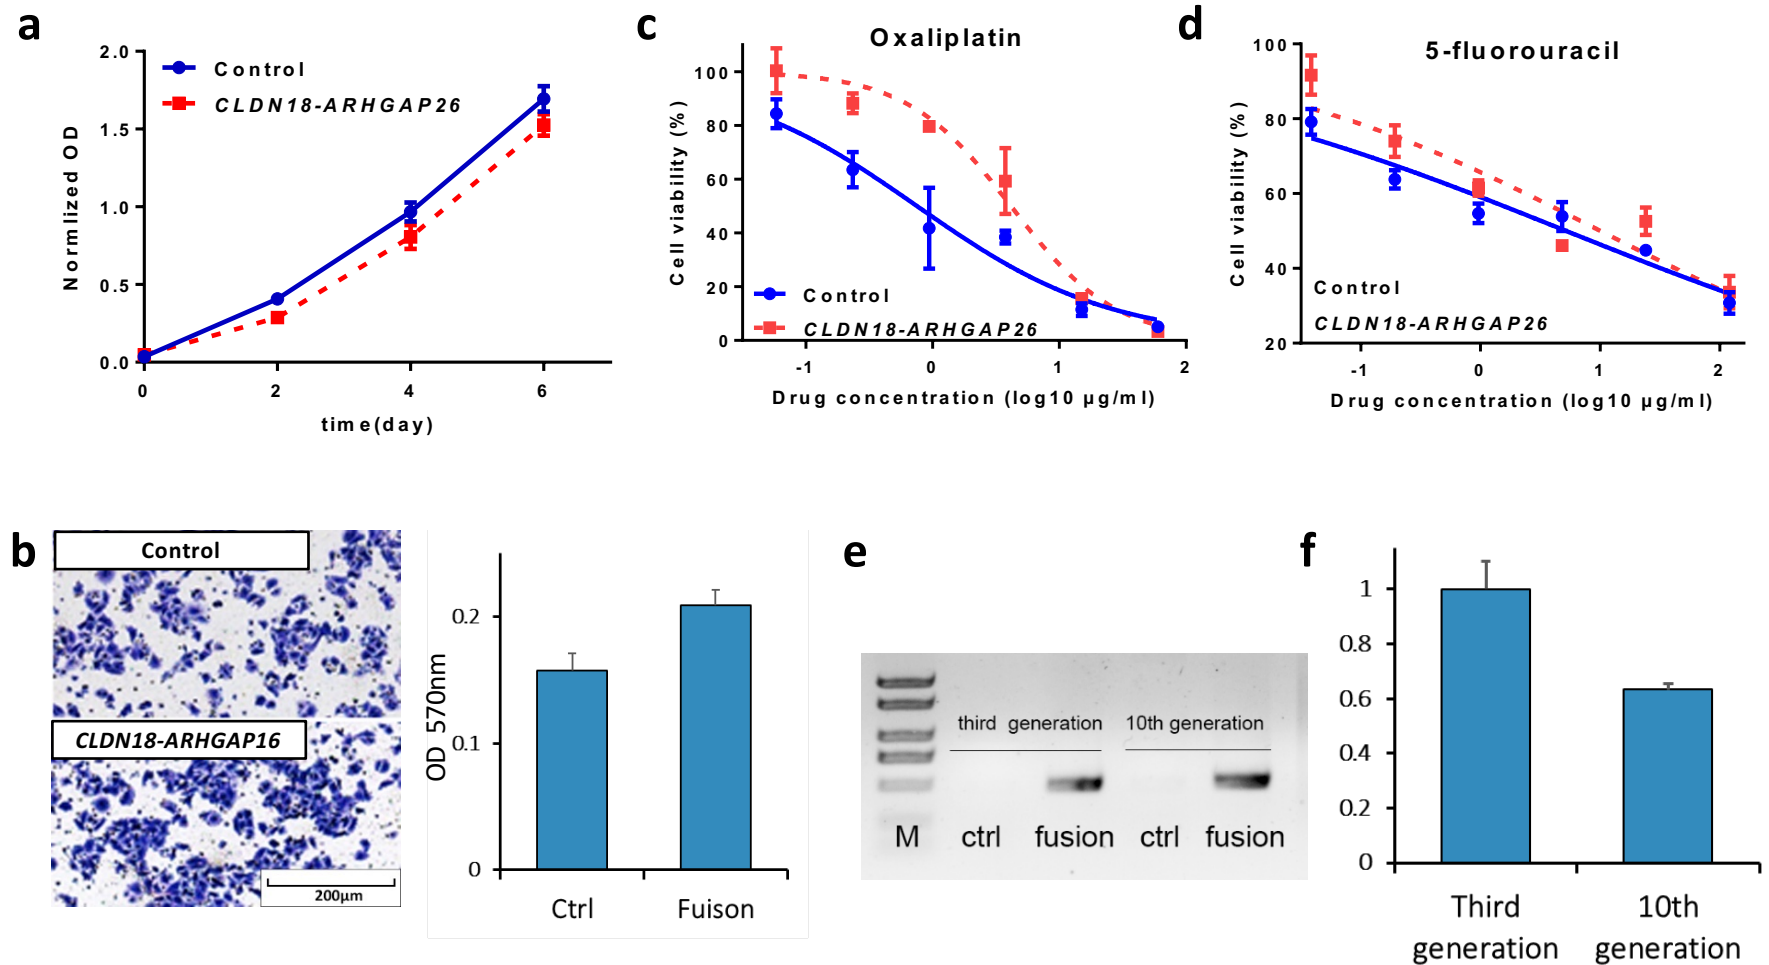

**Supplementary Figure 13: Introduction of *CLDN18-ARHGAP26* in cell lines.** Cell proliferation (a), cell migration (b), and drug response to oxaliplatin (c) 5-fluorouracil (d) was estimated in *CLDN18-ARHGAP26* stably expressed BGC-823 cells and their matched control with retrovirus infection system. Expression level of *CLDN18-ARHGAP26* in AGS cells was estimated by reverse-transcript PCR (e) or qPCR (f) for different generations. Each experiment has been replicated for three times, and data is presented as mean  $\pm$  SD; Ctrl: empty control.

**Supplementary Table 1: Characteristics of all patients (2006-2012)**

| <b>Variables</b>               | <b>Characteristics</b> | <b>All patients<br/>N = 1868 (%)</b> |
|--------------------------------|------------------------|--------------------------------------|
| <b>SRC Status</b>              | <b>Non-SRCC</b>        | 937 (50.2)                           |
|                                | <b>Con-SRCC</b>        | 556 (29.8)                           |
|                                | <b>SRCC</b>            | 375 (20.0)                           |
| <b>Age</b>                     | <b>Years</b>           | 57.2±11.8                            |
| <b>Gender</b>                  | <b>Male</b>            | 1307 (70.0)                          |
|                                | <b>Female</b>          | 561 (30.0)                           |
| <b>Tumor Size</b>              | <b>cm</b>              | 5.4±3.1                              |
| <b>Tumor Location</b>          | <b>U</b>               | 504 (27.0)                           |
|                                | <b>M</b>               | 213 (11.4)                           |
|                                | <b>L</b>               | 1106 (59.2)                          |
|                                | <b>UML</b>             | 45 (2.4)                             |
| <b>Tumor Grade</b>             | <b>G1-2</b>            | 367 (19.6)                           |
|                                | <b>G3-4</b>            | 1501 (80.4)                          |
| <b>Residual Degree</b>         | <b>R0</b>              | 1643 (88.0)                          |
|                                | <b>R1/R2</b>           | 225 (12.0)                           |
| <b>T stage</b>                 | <b>T1</b>              | 343 (18.4)                           |
|                                | <b>T2</b>              | 232 (12.4)                           |
|                                | <b>T3</b>              | 141 (7.5)                            |
|                                | <b>T4</b>              | 1152 (61.7)                          |
| <b>N stage</b>                 | <b>N0</b>              | 554 (29.7)                           |
|                                | <b>N1</b>              | 341 (18.3)                           |
|                                | <b>N2</b>              | 305 (16.3)                           |
|                                | <b>N3</b>              | 668 (35.8)                           |
| <b>M stage</b>                 | <b>M0</b>              | 1664 (89.1)                          |
|                                | <b>M1</b>              | 204 (10.9)                           |
| <b>TNM stage</b>               | <b>I</b>               | 396 (21.2)                           |
|                                | <b>II</b>              | 368 (19.7)                           |
|                                | <b>III</b>             | 900 (48.2)                           |
|                                | <b>IV</b>              | 204 (10.9)                           |
| <b>Chemotherapy</b>            | <b>with</b>            | 721 (38.6)                           |
|                                | <b>Without</b>         | 1147 (61.4)                          |
| <b>Lauren's Classification</b> | <b>Intestinal</b>      | 94 (5.0)                             |
|                                | <b>Diffuse</b>         | 197 (10.6)                           |
|                                | <b>Unknown</b>         | 1577 (84.4)                          |
| <b>Nervous invasion†</b>       | <b>Negative</b>        | 1723 (92.2)                          |
|                                | <b>Positive</b>        | 145 (7.8)                            |
| <b>Capillary invasion†</b>     | <b>Negative</b>        | 1487 (79.6)                          |
|                                | <b>Positive</b>        | 381 (20.4)                           |
| <b>Extranodal metastasis†</b>  | <b>Negative</b>        | 1625 (87.0)                          |
|                                | <b>Positive</b>        | 243 (13.0)                           |

†According to the Japanese classification of gastric carcinoma: 3rd English edition.

Abbreviations: non-SRCC, cancers without signet-ring cells; con-SRCC, cancers with <50% presence of signet-ring cells; SRCC, cancers with >50% presence of signet-ring cells; U, upper; M, middle, L, lower.

**Supplementary Table 2: Comparison of the Clinicopathological characteristics of patients of non-SRCC, con-SRCC, and SRCC (2006-2012)**

| Variables              | Characteristics | Non-SRCC<br>N = 937 (%) | Con-SRCC<br>N = 556 (%) | SRCC<br>N = 375 (%) | P value |
|------------------------|-----------------|-------------------------|-------------------------|---------------------|---------|
| Age                    | Years           | 59.6 ± 10.7             | 55.3 ± 12.1             | 54.0 ± 12.7         | < 0.001 |
| Gender                 | Male            | 725 (77.4)              | 373 (67.1)              | 209 (55.7)          | < 0.001 |
|                        | Female          | 212 (22.6)              | 183 (32.9)              | 166 (44.3)          |         |
| Tumor Size             | cm              | 5.2 ± 2.7               | 5.5 ± 3.3               | 5.7 ± 3.6           | 0.242   |
| Longitudinal Location  | U               | 321 (34.3)              | 122 (21.9)              | 61 (16.3)           | < 0.001 |
|                        | M               | 113 (12.1)              | 56 (10.1)               | 44 (11.7)           |         |
|                        | L               | 494 (52.7)              | 362 (65.1)              | 250 (66.7)          |         |
|                        | UML             | 9 (1.0)                 | 16 (2.9)                | 20 (5.3)            |         |
| Tumor Grade            | G1-2            | 351 (37.5)              | 16 (2.9)                | 0 (0)               | < 0.001 |
|                        | G3-4            | 586 (62.5)              | 540 (97.1)              | 375 (100)           |         |
| Residual Degree        | R0              | 838 (89.4)              | 482 (86.7)              | 323 (86.1)          | 0.139   |
|                        | R1/R2           | 99 (10.6)               | 74 (13.3)               | 52 (13.9)           |         |
| pT stage               | T1              | 183 (19.5)              | 99 (17.8)               | 61 (16.3)           | 0.003   |
|                        | T2              | 132 (14.1)              | 69 (12.4)               | 31 (8.3)            |         |
|                        | T3              | 77 (8.2)                | 40 (7.2)                | 24 (6.4)            |         |
|                        | T4              | 545 (58.2)              | 348 (62.6)              | 259 (69.1)          |         |
| pN stage               | N0              | 320 (34.2)              | 141 (25.4)              | 93 (24.8)           | < 0.001 |
|                        | N1              | 198 (21.1)              | 83 (14.9)               | 60 (16.0)           |         |
|                        | N2              | 171 (18.2)              | 81 (14.6)               | 53 (14.1)           |         |
|                        | N3              | 248 (26.5)              | 251 (45.1)              | 169 (45.1)          |         |
| pM stage               | M0              | 847 (90.4)              | 480 (86.3)              | 337 (89.9)          | 0.045   |
|                        | M1              | 90 (9.6)                | 76 (13.7)               | 38 (10.1)           |         |
| pTNM stage             | I               | 224 (23.9)              | 112 (20.1)              | 60 (16.0)           | < 0.001 |
|                        | II              | 203 (21.7)              | 92 (16.5)               | 73 (19.5)           |         |
|                        | III             | 420 (44.8)              | 276 (49.6)              | 204 (54.4)          |         |
|                        | IV              | 90 (9.6)                | 76 (13.7)               | 38 (10.1)           |         |
| Nervous invasion†      | Negative        | 891 (95.1)              | 502 (90.3)              | 330 (88.0)          | < 0.001 |
|                        | Positive        | 46 (4.9)                | 54 (9.7)                | 45 (12.0)           |         |
| Capillary invasion†    | Negative        | 756 (80.7)              | 432 (77.7)              | 299 (79.7)          | 0.383   |
|                        | Positive        | 181 (19.3)              | 124 (22.3)              | 76 (20.3)           |         |
| Extranodal metastasis† | Negative        | 826 (88.2)              | 485 (87.2)              | 314 (83.7)          | 0.097   |
|                        | Positive        | 111 (11.8)              | 71 (12.8)               | 61 (16.3)           |         |

†According the Japanese classification of gastric carcinoma: 3rd English edition.

Abbreviations: non-SRCC, cancers without signet-ring cells; con-SRCC, cancers with <50% presence of signet-ring cells; SRCC, cancers with >50% presence of signet-ring cells; U, upper; M, middle, L, lower. P value was calculated by the comparison among the Non-SRCC, Con-SRCC and SRCC groups, age and tumor size were tested by one-way ANOVA test, tumor grade and tumor stage were tested by Kruskal-Wallis test and others were tested by Pearson's Chi-square test.

**Supplementary Table 3: Clinicopathological characteristics of patients of non-SRCC, con-SRCC, SRCC and HSRCC patients (2012)**

| Variables              | Characteristics | Non-SRCC    | Con-SRCC    | SRCC       | HSRCC      | P value* |
|------------------------|-----------------|-------------|-------------|------------|------------|----------|
|                        |                 | N = 168 (%) | N = 156 (%) | N = 77 (%) | N = 32 (%) |          |
| Age                    | Years           | 61.4±9.9    | 56.3±12.2   | 55.3±11.7  | 52.9±13.3  | < 0.001  |
| Gender                 | Male            | 130 (77.4)  | 108 (69.2)  | 44 (57.1)  | 25 (78.1)  | 0.005    |
|                        | Female          | 38 (22.6)   | 48 (30.8)   | 33 (42.9)  | 7 (21.9)   |          |
| Tumor Size             | cm              | 5.2±2.8     | 5.9±2.9     | 5.9±2.8    | 7.4±2.8    | 0.061    |
| Tumor Location         | U               | 71 (42.3)   | 41 (26.3)   | 19 (24.7)  | 4 (12.5)   | < 0.001  |
|                        | M               | 26 (15.5)   | 8 (5.1)     | 8 (10.4)   | 6 (18.8)   |          |
|                        | L               | 70 (41.7)   | 104 (66.7)  | 48 (62.3)  | 19 (59.4)  |          |
|                        | UML             | 1 (0.6)     | 3 (1.9)     | 2 (2.6)    | 3 (9.4)    |          |
| Tumor Grade            | G1-2            | 72 (42.9)   | 2 (1.3)     | 0 (0)      | 0 (0)      | < 0.001  |
|                        | G3-4            | 96 (57.1)   | 154 (98.7)  | 77 (100)   | 32 (100)   |          |
| Residual Degree        | R0              | 149 (88.7)  | 134 (85.9)  | 66 (85.7)  | 28 (87.5)  | 0.703    |
|                        | R1/R2           | 19 (11.3)   | 22 (14.1)   | 11 (14.3)  | 4 (12.5)   |          |
| pT stage               | T1              | 41 (24.4)   | 19 (12.2)   | 9 (11.7)   | 1 (3.1)    | 0.001    |
|                        | T2              | 25 (14.9)   | 19 (12.2)   | 9 (11.7)   | 1 (3.1)    |          |
|                        | T3              | 26 (15.5)   | 24 (15.4)   | 7 (9.1)    | 2 (6.2)    |          |
|                        | T4              | 76 (45.2)   | 94 (60.3)   | 52 (67.5)  | 28 (87.5)  |          |
| pN stage               | N0              | 73 (43.5)   | 34 (21.8)   | 12 (15.6)  | 5 (15.6)   | < 0.001  |
|                        | N1              | 35 (20.8)   | 18 (11.5)   | 15 (19.5)  | 1 (3.1)    |          |
|                        | N2              | 29 (17.3)   | 19 (12.2)   | 13 (16.9)  | 2 (6.2)    |          |
|                        | N3              | 31 (18.5)   | 85 (54.5)   | 37 (48.1)  | 24 (75.0)  |          |
| pM stage               | M0              | 160 (95.2)  | 135 (86.5)  | 71 (92.2)  | 26 (81.2)  | 0.021    |
|                        | M1              | 8 (4.8)     | 21 (13.5)   | 6 (7.8)    | 6 (18.8)   |          |
| pTNM stage             | I               | 52 (31.0)   | 22 (14.1)   | 8 (10.4)   | 2 (6.2)    | < 0.001  |
|                        | II              | 38 (22.6)   | 28 (17.9)   | 18 (23.4)  | 2 (6.2)    |          |
|                        | III             | 70 (41.7)   | 85 (54.5)   | 45 (58.4)  | 22 (68.8)  |          |
|                        | IV              | 8 (4.8)     | 21 (13.5)   | 6 (7.8)    | 6 (18.8)   |          |
| Nervous invasion†      | Negative        | 158 (94.0)  | 135 (86.5)  | 73 (94.8)  | 29 (90.6)  | 0.027    |
|                        | Positive        | 10 (6.0)    | 21 (13.5)   | 4 (5.2)    | 3 (9.4)    |          |
| Capillary invasion†    | Negative        | 151 (89.9)  | 124 (79.5)  | 66 (85.7)  | 30 (93.8)  | 0.032    |
|                        | Positive        | 17 (10.1)   | 32 (20.5)   | 11 (14.3)  | 2 (6.2)    |          |
| Extranodal metastasis† | Negative        | 158 (94.0)  | 141 (90.4)  | 67 (87.0)  | 27 (84.4)  | 0.171    |
|                        | Positive        | 10 (6.0)    | 15 (9.6)    | 10 (13.0)  | 5 (15.6)   |          |
| Lauren Type            | Intestinal      | 83 (49.4)   | 11 (7.1)    | 0 (0)      | 0 (0)      | < 0.001  |
|                        | Diffuse         | 15 (8.9)    | 117 (75.0)  | 65 (84.4)  | 32 (100)   |          |
|                        | Unknown         | 70 (41.7)   | 28 (17.9)   | 12 (15.6)  | 0 (0)      |          |
| Chemotherapy           | With            | 72 (42.9)   | 73 (46.8)   | 30 (39.0)  | 17 (53.1)  | 0.507    |
|                        | Without         | 96 (57.1)   | 83 (53.2)   | 47 (61.0)  | 15 (46.9)  |          |

†According the Japanese classification of gastric carcinoma: 3rd English edition.

Abbreviations: :non-SRCC, cancers without signet-ring cells; con-SRCC, cancers with <50% presence of signet-ring cells; SRCC, cancers with >50% presence of signet-ring cells; U, upper; M, middle, L, lower.

\*P value was calculated by the comparison among the Non-SRCC, Con-SRCC and SRCC groups, age and tumor size were tested by one-way ANOVA test, tumor grade and tumor stage were tested by Kruskal-Wallis test and others were tested by Pearson's Chi-square test.



**Supplementary Table 4: Correlation of clinical characteristics with the presence of *CLDN18-ARHGAP26/6* fusions in patients**

| Variables                | West China (N = 829)      |                       | TCGA (N = 295)               |                      |
|--------------------------|---------------------------|-----------------------|------------------------------|----------------------|
|                          | Univariate<br>OR (95% CI) | P value               | Multivariate†<br>OR (95% CI) | P value              |
| Gender (female vs. male) | 4.67 (2.83-7.72)          | $1.7 \times 10^{-9}$  | 2.81 (1.51-5.24)             | $7.8 \times 10^{-6}$ |
| Age (years)              | 0.94 (0.92-0.96)          | $4.2 \times 10^{-10}$ | 0.95 (0.92-0.97)             | 0.0001               |
| Lauren's Classification  | 1.79 (1.19-2.69)          | 0.005                 | 1.59 (0.82-3.06)             | NA                   |
| SRCC status              | 2.62 (1.90-3.62)          | $4.1 \times 10^{-9}$  | 1.82 (1.12-2.97)             | 0.0007               |
| T stage                  | 1.35 (0.92-1.98)          | 0.13                  | 0.91 (0.48-1.71)             | 0.19                 |
| N stage                  | 3.60 (2.22-5.84)          | $2.2 \times 10^{-7}$  | 4.17 (1.91-9.07)             | $1.4 \times 10^{-5}$ |
| M stage                  | 2.34 (1.34-4.07)          | 0.003                 | 7.08 (1.10-45.51)            | 0.43                 |
| TNM stage                | 2.40 (1.61-3.57)          | $1.7 \times 10^{-5}$  | 0.19 (0.03-1.07)             | NA                   |
|                          |                           |                       | 1.14(0.84-1.56)              | 0.4                  |

Enrichment of patients with *CLDN18-ARHGAP26/6* fusions in terms of clinical characteristics were estimated in both TCGA and our patients, † all clinical characteristics have been adjusted in the multivariate analyses except Lauren's classification and TNM stage (due to multicollinearity). P value and ORs were estimated by the logistic regression model. Abbreviations: OR, Odds ratio; 95% CI, 95% confidence interval of the risk ratio

**Supplementary Table 5: Statistics of whole genome sequencing data from 32 HSRC patients**

| Samples  | Normal Control        |                    |            |                          |                      | Tumor                 |                    |            |                          |                      |
|----------|-----------------------|--------------------|------------|--------------------------|----------------------|-----------------------|--------------------|------------|--------------------------|----------------------|
|          | Total Reads Number(M) | Reads Mapping Rate | Mean Depth | Reference GenomeCoverage | PCR Duplication Rate | Total Reads Number(M) | Reads Mapping Rate | Mean Depth | Reference GenomeCoverage | PCR Duplication Rate |
| hx745393 | 849.32                | 0.9932             | 42.9       | 0.9983                   | 0.1018               | 1388.44               | 0.9968             | 70.5       | 0.9986                   | 0.1091               |
| hx061706 | 959.37                | 0.9974             | 48.7       | 0.9985                   | 0.1033               | 1408.22               | 0.9979             | 71.8       | 0.9987                   | 0.2147               |
| hx131593 | 856.4                 | 0.9956             | 43.5       | 0.9918                   | 0.1055               | 1456.42               | 0.9979             | 74.3       | 0.9924                   | 0.2136               |
| hx241856 | 1019.26               | 0.9961             | 51.8       | 0.9919                   | 0.117                | 1748.81               | 0.998              | 89.3       | 0.9925                   | 0.2276               |
| hx289650 | 844.25                | 0.9963             | 42.9       | 0.9981                   | 0.1099               | 1344.25               | 0.9972             | 68.2       | 0.9984                   | 0.1373               |
| hx429924 | 722.36                | 0.996              | 36.6       | 0.998                    | 0.1082               | 1354.66               | 0.9973             | 68.8       | 0.9984                   | 0.1341               |
| hx429928 | 663.09                | 0.9931             | 33.5       | 0.9979                   | 0.1051               | 1173.86               | 0.997              | 59.6       | 0.9983                   | 0.1248               |
| hx965929 | 879.77                | 0.9949             | 44.5       | 0.9981                   | 0.1247               | 1316.26               | 0.9975             | 66.9       | 0.9984                   | 0.1322               |
| hx536055 | 798.29                | 0.9921             | 40.3       | 0.9979                   | 0.1103               | 1228.96               | 0.9967             | 62.4       | 0.9982                   | 0.1233               |
| hx585635 | 785.74                | 0.9958             | 39.9       | 0.9918                   | 0.2175               | 1205.54               | 0.9977             | 61.4       | 0.9922                   | 0.1239               |
| hx667152 | 787.23                | 0.9951             | 39.9       | 0.9981                   | 0.2128               | 1157.05               | 0.9969             | 58.8       | 0.9984                   | 0.1204               |
| hx695561 | 745.15                | 0.9944             | 37.8       | 0.9981                   | 0.2156               | 1192.95               | 0.9975             | 60.7       | 0.9984                   | 0.1256               |
| hx702361 | 655.24                | 0.9884             | 32.8       | 0.998                    | 0.0828               | 1184.04               | 0.9961             | 60         | 0.9984                   | 0.1248               |
| hx754247 | 713.31                | 0.9963             | 36.2       | 0.9916                   | 0.0692               | 1204.18               | 0.9979             | 61.4       | 0.9921                   | 0.1175               |
| hx786737 | 813.61                | 0.9929             | 41.1       | 0.9978                   | 0.0841               | 1267.95               | 0.9969             | 64.5       | 0.9981                   | 0.1246               |
| hx775336 | 736.97                | 0.9951             | 37.3       | 0.9977                   | 0.0758               | 1184.04               | 0.9974             | 60.2       | 0.9981                   | 0.1144               |
| hx826723 | 779.23                | 0.9946             | 39.4       | 0.9981                   | 0.0903               | 1493.84               | 0.9977             | 76.1       | 0.9985                   | 0.1421               |
| hx984999 | 774.48                | 0.9951             | 39.2       | 0.992                    | 0.0796               | 1254.44               | 0.9978             | 64         | 0.9925                   | 0.121                |
| hx084109 | 757.72                | 0.9952             | 38.4       | 0.9982                   | 0.0788               | 1264.25               | 0.9975             | 64.3       | 0.9985                   | 0.1201               |
| hx481856 | 789.18                | 0.9938             | 39.9       | 0.9916                   | 0.0875               | 1400.69               | 0.9972             | 71.2       | 0.9921                   | 0.1464               |
| hx098791 | 691.01                | 0.9896             | 34.7       | 0.998                    | 0.0929               | 1358.01               | 0.9968             | 68.9       | 0.9985                   | 0.1469               |
| hx085803 | 605.8                 | 0.9944             | 30.6       | 0.9979                   | 0.1294               | 1293.77               | 0.9971             | 65.7       | 0.9985                   | 0.1478               |
| hx300581 | 737.98                | 0.9971             | 37.4       | 0.998                    | 0.1301               | 1241.47               | 0.9975             | 63.2       | 0.9983                   | 0.1398               |
| hx334496 | 880.94                | 0.9978             | 44.7       | 0.9981                   | 0.1405               | 1325.77               | 0.9982             | 67.5       | 0.9984                   | 0.1473               |
| hx347539 | 741.54                | 0.997              | 37.6       | 0.9981                   | 0.1324               | 1221.62               | 0.9973             | 62.1       | 0.9985                   | 0.1358               |
| hx516851 | 809.85                | 0.9978             | 41.1       | 0.9982                   | 0.1363               | 1234.35               | 0.9978             | 62.7       | 0.9985                   | 0.1439               |
| hx541567 | 731.78                | 0.9977             | 37.1       | 0.9981                   | 0.1326               | 1127.05               | 0.9977             | 57.2       | 0.9985                   | 0.1431               |
| hx612962 | 872.41                | 0.9978             | 44.4       | 0.992                    | 0.1399               | 1359.45               | 0.998              | 69.2       | 0.9923                   | 0.1528               |
| hx574409 | 795.15                | 0.9979             | 40.4       | 0.9981                   | 0.1348               | 1148.31               | 0.9979             | 58.4       | 0.9983                   | 0.145                |
| hx580624 | 807.67                | 0.9956             | 41         | 0.9919                   | 0.1367               | 1222.61               | 0.9981             | 62.3       | 0.9923                   | 0.1462               |
| hx025945 | 897.33                | 0.9939             | 45.4       | 0.9983                   | 0.1024               | 1360.41               | 0.9966             | 69.1       | 0.9985                   | 0.1097               |
| hx269480 | 1027.09               | 0.9961             | 52.1       | 0.9982                   | 0.1143               | 1636.64               | 0.9978             | 83.3       | 0.9984                   | 0.1207               |
